# Supplementary material
Source: PubMed Central journal article supplement (PMC3092805)
Supplement: NIHMS292432-supplement-1_si_001.pdf [file NIHMS292432-supplement-1_si_001.pdf]

# Supporting Information

for

## Two-Dimensional Packing of Short DNA with Non-Pairing Overhangs in Cationic Liposome–DNA Complexes: From Onsager Nematics to Columnar Nematics With Finite-Length Columns

*Nathan F. Bouxsein, Cecília Leal, Christopher S. McAllister, Kai K. Ewert, Youli Li, Charles E. Samuel, Cyrus R. Safinya\**

| <b>Content</b>                                                                                       | <b>Page</b> |
|------------------------------------------------------------------------------------------------------|-------------|
| <b>Table S1.</b><br>Sequences of the sense and anti-sense strands of the short DNA molecules studied | S2          |
| <b>Derivation of Equations S1 and S2</b>                                                             | S3          |

**Table S1.** Sequences of the sense and anti-sense strands of the short DNA molecules studied.

|    | sequence <sup>a</sup>                                      | duplex name  |
|----|------------------------------------------------------------|--------------|
| s  | CTTACGCTGAGTT                                              | 11bp DNA-2T  |
| as | CTCAGCGTAAGTT                                              |              |
| s  | CTTACGCTGAGTTTTT                                           | 11bp DNA-5T  |
| as | CTCAGCGTAAGTTTTT                                           |              |
| s  | CTTACGCTGAGTTTTTTTTT                                       | 11bp DNA-10T |
| as | CTCAGCGTAAGTTTTTTTTT                                       |              |
| s  | ATCACTTACGCTGAGTACTTCGAATT                                 | 24bp DNA-2T  |
| as | TTCGAAGTACTCAGCGTAAGTGATTT                                 |              |
| s  | ATCACTTACGCTGAGTACTTCGAATTTTT                              | 24bp DNA-5T  |
| as | TTCGAAGTACTCAGCGTAAGTGATTTTTT                              |              |
| s  | ATCACTTACGCTGAGTACTTCGAATTTTTTTTTT                         | 24bp DNA-10T |
| as | TTCGAAGTACTCAGCGTAAGTGATTTTTTTTTT                          |              |
| s  | ACAGATGCACATATCGAGGTGGACATCACTTACGCTGAGTACTTCGAATT         | 48bp DNA-2T  |
| as | TTCGAAGTACTCAGCGTAAGTGATGTCCACCTCGATATGTGCATCTGTTT         |              |
| s  | ACAGATGCACATATCGAGGTGGACATCACTTACGCTGAGTACTTCGAATTTTTT     | 48bp DNA-5T  |
| as | TTCGAAGTACTCAGCGTAAGTGATGTCCACCTCGATATGTGCATCTGTTTTT       |              |
| s  | ACAGATGCACATATCGAGGTGGACATCACTTACGCTGAGTACTTCGAATTTTTTTTTT | 48bp DNA-10T |
| as | TTCGAAGTACTCAGCGTAAGTGATGTCCACCTCGATATGTGCATCTGTTTTTTTTT   |              |

<sup>a</sup> sense (s) and anti-sense (as) strands as indicated

## Derivation of Equations S1 and S2

As outlined in the text,

$$\sigma_M = \sigma_{CL} \frac{N_{CL}}{N_{CL} + rN_{NL}}, \text{ where } \sigma_{CL} = \frac{eZ_{CL}}{a_{CL}}$$

For  $r = 1 + \varepsilon$  with  $|\varepsilon| \ll 1$

$$\frac{N_{CL}}{N_{CL} + rN_{NL}} = \frac{N_{CL}}{N_{CL} + N_{NL} + \varepsilon N_{NL}} = \Phi_{CL} \frac{1}{1 + \varepsilon \Phi_{NL}},$$

$$\text{since } \Phi_{CL} = \frac{N_{CL}}{N_{CL} + N_{NL}} = 1 - \Phi_{NL} = 1 - \frac{N_{NL}}{N_{CL} + N_{NL}}.$$

$\Phi_{NL} \leq 1$  by definition, and thus  $|\varepsilon \Phi_{NL}| \leq |\varepsilon| \ll 1$ .

Therefore,  $\frac{1}{1 + \varepsilon \Phi_{NL}} \approx 1 - \varepsilon \Phi_{NL}$  (Taylor series expansion).

Substituting these results into the equation for  $\sigma_M$ , we obtain

$$\sigma_M = \sigma_{CL} \frac{N_{CL}}{N_{CL} + rN_{NL}} = \sigma_{CL} \Phi_{CL} \frac{1}{1 + \varepsilon \Phi_{NL}} \approx \sigma_{CL} \Phi_{CL} (1 - \varepsilon \Phi_{NL}) = \sigma_{CL} (1 - \Phi_{NL})(1 - \varepsilon \Phi_{NL}) \quad (\text{S1})$$

Equating this with the other expression for  $\sigma_M$ , we obtain

$$\sigma_M = \frac{e}{3.4 \text{ \AA} d_{DNA}} \approx \sigma_{CL} (1 - \Phi_{NL})(1 - \varepsilon \Phi_{NL}) = \frac{eZ_{CL}}{a_{CL}} (1 - \Phi_{NL})(1 - \varepsilon \Phi_{NL})$$

$$\Leftrightarrow d_{DNA} \approx \frac{a_{CL}}{3.4 \text{ \AA} Z_{CL}} \frac{1}{(1 - \Phi_{NL})(1 - \varepsilon \Phi_{NL})} \quad (\text{S2})$$
